# Supplementary material for: Unsupervised clustering of gene expression data points at hypoxia as possible trigger for metabolic syndrome
Source: PubMed Central journal article supplement (PMC1770922; doi:10.1186/1471-2164-7-318), 2006-12-19
Supplement: 1471-2164-7-318-S3.pdf [file 1471-2164-7-318-S3.pdf]

## EASE RESULTS

| <i>System</i>      | <i>Category</i>                                   | <i>LH</i> | <i>LT</i> | <i>PH</i> | <i>PT</i> | <i>EASE Score</i> | <i>Fisher Exact</i> |
|--------------------|---------------------------------------------------|-----------|-----------|-----------|-----------|-------------------|---------------------|
| cellular_component | cytoplasm                                         | 40        | 44        | 2145      | 7038      | 1.74E-16          | 5.75E-17            |
| molecular_function | structural molecule activity                      | 23        | 49        | 440       | 8126      | 5.73E-16          | 6.31E-17            |
| cellular_component | cytosolic ribosome (sensu Eukarya)                | 10        | 44        | 32        | 7038      | 1.23E-13          | 1.76E-15            |
| biological_process | muscle development                                | 13        | 46        | 101       | 7825      | 2.21E-13          | 8.71E-15            |
| cellular_component | muscle fiber                                      | 10        | 44        | 35        | 7038      | 3.06E-13          | 4.94E-15            |
| biological_process | muscle contraction                                | 12        | 46        | 106       | 7825      | 1.15E-11          | 5.37E-13            |
| cellular_component | ribosome                                          | 12        | 44        | 103       | 7038      | 1.49E-11          | 7.18E-13            |
| molecular_function | structural constituent of ribosome                | 12        | 49        | 110       | 8126      | 2.5E-11           | 1.25E-12            |
| biological_process | protein biosynthesis                              | 16        | 46        | 348       | 7825      | 3.99E-10          | 4.88E-11            |
| molecular_function | structural constituent of muscle                  | 8         | 49        | 32        | 8126      | 4.79E-10          | 9.06E-12            |
| biological_process | cell motility                                     | 14        | 46        | 242       | 7825      | 5.2E-10           | 5.01E-11            |
| cellular_component | cytosol                                           | 13        | 44        | 200       | 7038      | 1.41E-09          | 1.28E-10            |
| biological_process | striated muscle contraction                       | 7         | 46        | 28        | 7825      | 8.78E-09          | 1.63E-10            |
| cellular_component | myofibril                                         | 7         | 44        | 27        | 7038      | 9.74E-09          | 1.83E-10            |
| cellular_component | sarcomere                                         | 7         | 44        | 27        | 7038      | 9.74E-09          | 1.83E-10            |
| cellular_component | ribonucleoprotein complex                         | 12        | 44        | 192       | 7038      | 1.26E-08          | 1.18E-09            |
| cellular_component | actin cytoskeleton                                | 10        | 44        | 153       | 7038      | 0.000000257       | 2.31E-08            |
| biological_process | macromolecule biosynthesis                        | 16        | 46        | 570       | 7825      | 0.000000318       | 6.46E-08            |
| cellular_component | cytosolic small ribosomal subunit (sensu Eukarya) | 5         | 44        | 13        | 7038      | 0.00000083        | 9.37E-09            |
| cellular_component | eukaryotic 48S initiation complex                 | 5         | 44        | 13        | 7038      | 0.00000083        | 9.37E-09            |
| biological_process | biosynthesis                                      | 16        | 46        | 678       | 7825      | 0.00000292        | 0.000000707         |
| cellular_component | intracellular                                     | 40        | 44        | 4121      | 7038      | 0.00000343        | 0.00000219          |
| molecular_function | RNA binding                                       | 12        | 49        | 344       | 8126      | 0.00000368        | 0.000000613         |
| cellular_component | cytosolic large ribosomal subunit (sensu Eukarya) | 5         | 44        | 19        | 7038      | 0.00000438        | 8.24E-08            |
| cellular_component | eukaryotic 43S preinitiation complex              | 5         | 44        | 24        | 7038      | 0.0000117         | 0.000000294         |
| cellular_component | large ribosomal subunit                           | 5         | 44        | 26        | 7038      | 0.0000164         | 0.000000451         |
| cellular_component | small ribosomal subunit                           | 5         | 44        | 26        | 7038      | 0.0000164         | 0.000000451         |
| cellular_component | striated muscle thin filament                     | 4         | 44        | 9         | 7038      | 0.0000174         | 0.000000164         |
| cellular_component | muscle myosin                                     | 4         | 44        | 15        | 7038      | 0.0000919         | 0.00000173          |
| biological_process | regulation of muscle contraction                  | 4         | 46        | 16        | 7825      | 0.0000945         | 0.00000181          |
| biological_process | organogenesis                                     | 14        | 46        | 696       | 7825      | 0.0000973         | 0.0000276           |
| cellular_component | myosin II                                         | 4         | 44        | 17        | 7038      | 0.000136          | 0.00000298          |
| cellular_component | cytoskeleton                                      | 11        | 44        | 435       | 7038      | 0.000222          | 0.0000528           |
| biological_process | morphogenesis                                     | 14        | 46        | 797       | 7825      | 0.00038           | 0.000123            |
| cellular_component | smooth endoplasmic reticulum                      | 3         | 44        | 6         | 7038      | 0.000539          | 0.0000045           |
| cellular_component | hemoglobin complex                                | 3         | 44        | 7         | 7038      | 0.000751          | 0.00000784          |
| molecular_function | cytoskeletal protein binding                      | 7         | 49        | 187       | 8126      | 0.000753          | 0.000116            |
| molecular_function | actin binding                                     | 6         | 49        | 146       | 8126      | 0.00161           | 0.000225            |
| cellular_component | myosin                                            | 4         | 44        | 40        | 7038      | 0.00179           | 0.000103            |
| biological_process | protein metabolism                                | 19        | 46        | 1635      | 7825      | 0.00268           | 0.00131             |
| biological_process | translational elongation                          | 3         | 46        | 15        | 7825      | 0.00324           | 0.0000823           |
| biological_process | translation                                       | 5         | 46        | 111       | 7825      | 0.00365           | 0.000453            |
| biological_process | development                                       | 14        | 46        | 1270      | 7825      | 0.0231            | 0.0118              |
| molecular_function | translation factor activity, nucleic acid binding | 3         | 49        | 68        | 8126      | 0.0608            | 0.00785             |
| molecular_function | translation regulator activity                    | 3         | 49        | 69        | 8126      | 0.0624            | 0.00817             |
| molecular_function | structural constituent of cytoskeleton            | 3         | 49        | 75        | 8126      | 0.0722            | 0.0103              |
| molecular_function | calcium ion binding                               | 6         | 49        | 384       | 8126      | 0.0747            | 0.0269              |
| cellular_component | cell                                              | 42        | 44        | 6178      | 7038      | 0.0895            | 0.0816              |
| molecular_function | nucleic acid binding                              | 16        | 49        | 1830      | 8126      | 0.103             | 0.067               |
| molecular_function | motor activity                                    | 3         | 49        | 94        | 8126      | 0.106             | 0.0188              |
| biological_process | physiological process                             | 42        | 46        | 6633      | 7825      | 0.163             | 0.15                |
| biological_process | cellular physiological process                    | 21        | 46        | 2909      | 7825      | 0.195             | 0.149               |
| molecular_function | binding                                           | 32        | 49        | 4944      | 8126      | 0.354             | 0.313               |
| molecular_function | metal ion binding                                 | 7         | 49        | 826       | 8126      | 0.361             | 0.226               |
| molecular_function | molecular_function unknown                        | 5         | 49        | 543       | 8126      | 0.401             | 0.228               |
| molecular_function | protein binding                                   | 10        | 49        | 1375      | 8126      | 0.426             | 0.311               |
| biological_process | biological_process unknown                        | 4         | 46        | 500       | 7825      | 0.556             | 0.339               |

|                    |                                  |                    |    |      |      |       |       |
|--------------------|----------------------------------|--------------------|----|------|------|-------|-------|
| cellular_component | endoplasmic reticulum            | <a href="#">3</a>  | 44 | 302  | 7038 | 0.557 | 0.292 |
| cellular_component | cellular_component unknown       | <a href="#">4</a>  | 44 | 532  | 7038 | 0.641 | 0.428 |
| molecular_function | enzyme regulator activity        | <a href="#">3</a>  | 49 | 380  | 8126 | 0.664 | 0.404 |
| biological_process | metabolism                       | <a href="#">25</a> | 46 | 4356 | 7825 | 0.681 | 0.631 |
| molecular_function | purine nucleotide binding        | <a href="#">4</a>  | 49 | 1009 | 8126 | 0.948 | 0.874 |
| molecular_function | nucleotide binding               | <a href="#">4</a>  | 49 | 1022 | 8126 | 0.951 | 0.88  |
| biological_process | cellular process                 | <a href="#">21</a> | 46 | 4393 | 7825 | 0.958 | 0.943 |
| molecular_function | ATP binding                      | <a href="#">3</a>  | 49 | 811  | 8126 | 0.96  | 0.88  |
| molecular_function | adenyl nucleotide binding        | <a href="#">3</a>  | 49 | 819  | 8126 | 0.961 | 0.884 |
| molecular_function | transporter activity             | <a href="#">4</a>  | 49 | 1098 | 8126 | 0.966 | 0.913 |
| biological_process | transport                        | <a href="#">4</a>  | 46 | 1198 | 7825 | 0.977 | 0.937 |
| biological_process | response to stimulus             | <a href="#">4</a>  | 46 | 1230 | 7825 | 0.98  | 0.945 |
| molecular_function | hydrolase activity               | <a href="#">4</a>  | 49 | 1256 | 8126 | 0.985 | 0.957 |
| biological_process | response to external stimulus    | <a href="#">3</a>  | 46 | 1033 | 7825 | 0.987 | 0.953 |
| biological_process | organismal physiological process | <a href="#">3</a>  | 46 | 1211 | 7825 | 0.995 | 0.981 |
| biological_process | cell growth and/or maintenance   | <a href="#">8</a>  | 46 | 2478 | 7825 | 0.996 | 0.991 |
| molecular_function | catalytic activity               | <a href="#">9</a>  | 49 | 2935 | 8126 | 0.999 | 0.998 |
| cellular_component | integral to membrane             | <a href="#">3</a>  | 44 | 2126 | 7038 | 1     | 1     |
| cellular_component | nucleus                          | <a href="#">3</a>  | 44 | 2079 | 7038 | 1     | 1     |
| cellular_component | membrane                         | <a href="#">6</a>  | 44 | 2745 | 7038 | 1     | 1     |
